# Supplementary material
Source: PubMed Central journal article supplement (PMC4188801)

**Supplementary Table 1. Summary of Laboratory Values.**

| <b>HORMONE</b>            | <b>N</b> | <b>Mean (SD)</b> | <b>Range</b> | <b>Research Laboratory<br/>Healthy Male range</b> |
|---------------------------|----------|------------------|--------------|---------------------------------------------------|
| Testosterone (ng/dL)      | 96       | 342 (126)        | 49 – 672     | 175-781                                           |
| Free Testosterone (pg/mL) | 95       | 74 (27)          | 5 -140       | --                                                |
| Free Androgen Index       | 95       | 47 (24)          | 3 - 133      | --                                                |
| T/Estradiol Ratio         | 94       | 110 (56)         | 17 - 343     | --                                                |
| Estradiol (pg/mL)         | 94       | 34 (10)          | <20 - 58     | 20 - 47                                           |
| 25-OH Vitamin D (ng/mL)   | 96       | 26 (9)           | 8 - 63       | 9-38                                              |
| Leptin (ng/mL)            | 95       | 9.6 (7.2)        | 1.8 - 42.3   | 2.5 - 5.3 (lean)                                  |
| LH (mIU/mL)               | 96       | 3.3 (2.2)        | 0.4 - 13.6   | 1.24-8.62                                         |

**Supplementary Table 2. Unadjusted and age-adjusted Pearson correlations between all hormonal and metabolic measures.**

|                      | Correlation          | N  | UNADJUSTED |                  | AGE – ADJUSTED |                  |
|----------------------|----------------------|----|------------|------------------|----------------|------------------|
|                      |                      |    | R-value    | P-value          | R-value        | P-value          |
| Leptin               | Testosterone         | 95 | -0.24      | <b>0.02</b>      | -0.23          | <b>0.03</b>      |
|                      | Free Testosterone    | 95 | -0.10      | 0.36             | -0.05          | 0.65             |
|                      | Free Androgen Index  | 95 | 0.11       | 0.29             | 0.18           | 0.08             |
|                      | T/E2 Ratio           | 93 | -0.28      | <b>0.006</b>     | -0.27          | <b>0.01</b>      |
|                      | BMI                  | 83 | 0.64       | <b>&lt;0.001</b> | 0.64           | <b>&lt;0.001</b> |
|                      | 25-Hydroxyvitamin D* | 95 | -0.14      | 0.18             | -0.19          | 0.073            |
| BMI                  | Testosterone         | 84 | -0.24      | <b>0.03</b>      | -0.23          | <b>0.04</b>      |
|                      | Free Testosterone    | 83 | -0.13      | 0.24             | -0.11          | 0.34             |
|                      | Free Androgen Index  | 83 | 0.06       | 0.59             | 0.10           | 0.36             |
|                      | T/E2 Ratio           | 83 | -0.33      | <b>0.002</b>     | -0.33          | <b>0.003</b>     |
|                      | 25-Hydroxyvitamin D* | 84 | -0.17      | 0.12             | -0.19          | 0.08             |
| 25-Hydroxyvitamin D* | Testosterone         | 96 | 0.01       | 0.89             | 0.05           | 0.66             |
|                      | Free Testosterone    | 95 | -0.12      | 0.24             | -0.04          | 0.72             |
|                      | Free Androgen Index  | 95 | -0.24      | 0.02             | -0.15          | 0.14             |
|                      | T/E2 Ratio           | 94 | 0.001      | 0.99             | 0.04           | 0.74             |

\*Season Adjusted

Supplementary Figure 1. Longitudinal distribution of EDSS scores.

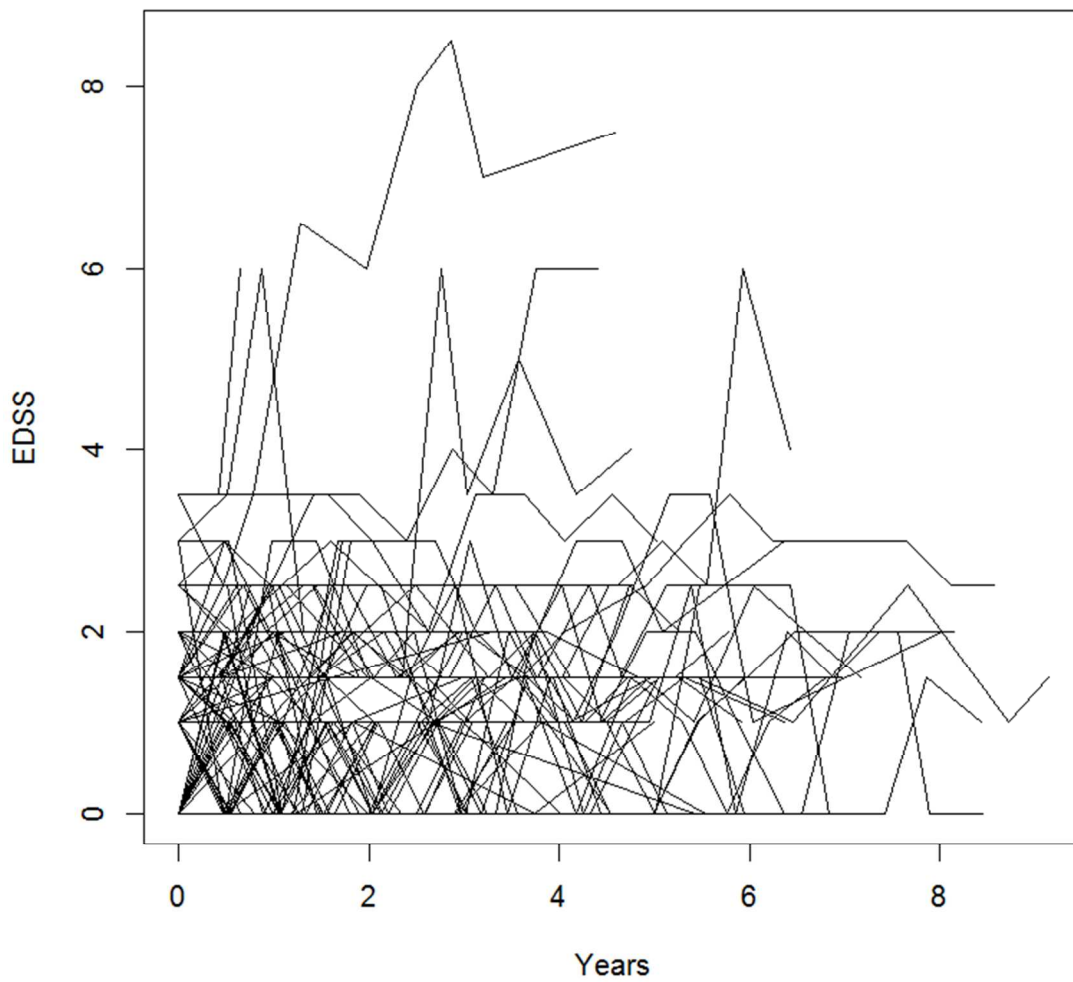

Supplement: NIHMS570300-supplement-01.pdf [file NIHMS570300-supplement-01.pdf]
